# Supplementary material for: Realizing expectations? High-impact entrepreneurship across countries
Source: Springer Nature journal article supplement (doi:10.1007/s11187-024-00921-3), 2024-05-04
Supplement: MOESM1 [file 27059070]

## APPENDICES

|                                                                                                                                       |    |
|---------------------------------------------------------------------------------------------------------------------------------------|----|
| A1. Further details regarding the underlying components of our main realized high-impact entrepreneurship measure.....                | 2  |
| A2. Alternative operationalizations of high-growth expectations entrepreneurship.....                                                 | 4  |
| A3. Conditional association realized high-impact entrepreneurship and high-growth expectations entrepreneurship .....                 | 6  |
| A4. Further details on the control variables used in stylized examples .....                                                          | 7  |
| A5. Unconditional regression results of stylized examples .....                                                                       | 10 |
| A6. Country-level descriptive statistics opportunity-motivated entrepreneurship and entrepreneurial opportunity projection bias ..... | 11 |
| A7. Conditional association between realized high-impact entrepreneurship and opportunity-motivated entrepreneurship .....            | 12 |

## A1. Further details regarding the underlying components of our main realized high-impact entrepreneurship measure

The descriptive statistics of the components underlying our latent measure of realized high-impact entrepreneurship are presented in Appendix Table 1. Appendix Table 2 presents the corresponding correlation matrix. Appendix Table 3 presents the country-level descriptives of our main measures.

Appendix Table 1. Descriptive statistics components of realized high-impact entrepreneurship

|                                                                                      | N  | Mean  | SD    | Min  | Max    |
|--------------------------------------------------------------------------------------|----|-------|-------|------|--------|
| <b>Components of realized high-impact entrepreneurship – counts</b>                  |    |       |       |      |        |
| Venture capital funded initial public offerings                                      | 62 | 19.81 | 88.60 | 0.00 | 685.00 |
| Unicorns                                                                             | 62 | 4.87  | 21.12 | 0.00 | 131.00 |
| Global top young entrepreneurial firms                                               | 62 | 2.06  | 8.33  | 0.00 | 60.00  |
| Billionaire entrepreneurs                                                            | 62 | 20.66 | 65.40 | 0.00 | 424.00 |
| <b>Components of realized high-impact entrepreneurship – per million inhabitants</b> |    |       |       |      |        |
| Venture capital funded initial public offerings per million inhabitants              | 62 | 0.31  | 0.60  | 0.00 | 2.21   |
| Unicorns per million inhabitants                                                     | 62 | 0.05  | 0.14  | 0.00 | 0.76   |
| Global top young entrepreneurial firms per million inhabitants                       | 62 | 0.02  | 0.05  | 0.00 | 0.25   |
| Billionaire entrepreneurs per million inhabitants                                    | 62 | 0.28  | 0.37  | 0.00 | 1.72   |
| <b>Main measures</b>                                                                 |    |       |       |      |        |
| High-growth expectations entrepreneurship                                            | 62 | 21.11 | 9.52  | 1.22 | 45.20  |
| Realized high-impact entrepreneurship                                                | 62 | 13.87 | 21.41 | 0.00 | 100.00 |

**Note.** We present the descriptive statistics of the unstandardized counts of the underlying components of realized high-impact entrepreneurship as well as of the population-standardized (per million inhabitants) measures. All variables are averaged over the period 2010–2017. The purpose of this is to allow for complementary insights into the underlying data. High-growth expectations entrepreneurship and realized high-impact entrepreneurship are presented for completeness. Complementing the descriptive statistics presented in the main manuscript, we present the unscaled raw version of high-growth expectations entrepreneurship here.

Appendix Table 2. Correlations between the components of realized high-impact entrepreneurship

|                                                                                      | 1     | 2     | 3     | 4     | 5     | 6     | 7     | 8     | 9    | 10   |
|--------------------------------------------------------------------------------------|-------|-------|-------|-------|-------|-------|-------|-------|------|------|
| <b>Components of realized high-impact entrepreneurship – counts</b>                  |       |       |       |       |       |       |       |       |      |      |
| 1 Venture capital funded initial public offerings                                    | 1.00  |       |       |       |       |       |       |       |      |      |
| 2 Unicorns                                                                           | 0.75* | 1.00  |       |       |       |       |       |       |      |      |
| 3 Global top young entrepreneurial firms                                             | 0.96* | 0.89* | 1.00  |       |       |       |       |       |      |      |
| 4 Billionaire entrepreneurs                                                          | 0.70* | 0.98* | 0.86* | 1.00  |       |       |       |       |      |      |
| <b>Components of realized high-impact entrepreneurship – per million inhabitants</b> |       |       |       |       |       |       |       |       |      |      |
| 5 Venture capital funded initial public offerings per million inhabitants            | 0.46* | 0.24  | 0.37* | 0.22  | 1.00  |       |       |       |      |      |
| 6 Unicorns per million inhabitants                                                   | 0.29* | 0.23  | 0.26* | 0.19  | 0.48* | 1.00  |       |       |      |      |
| 7 Global top young entrepreneurial firms per million inhabitants                     | 0.51* | 0.32* | 0.49* | 0.32* | 0.62* | 0.37* | 1.00  |       |      |      |
| 8 Billionaire entrepreneurs per million inhabitants                                  | 0.29* | 0.18  | 0.25* | 0.20  | 0.80* | 0.39* | 0.67* | 1.00  |      |      |
| <b>Main measures</b>                                                                 |       |       |       |       |       |       |       |       |      |      |
| 9 High-growth expectations entrepreneurship                                          | 0.15  | 0.11  | 0.15  | 0.09  | 0.05  | 0.09  | 0.16  | 0.07  | 1.00 |      |
| 10 Realized high-impact entrepreneurship                                             | 0.48* | 0.29* | 0.42* | 0.28* | 0.90* | 0.64* | 0.82* | 0.89* | 0.11 | 1.00 |

**Note.** \* denotes correlations that are statistically significant at the 5% level or lower.

Appendix Table 3. Country descriptive statistics

| Country code | Country              | Realized high-impact entrepreneurship | High-growth expectations entrepreneurship | Entrepreneurial projection bias |
|--------------|----------------------|---------------------------------------|-------------------------------------------|---------------------------------|
| AE           | United Arab Emirates | 25                                    | 69                                        | 44                              |
| AR           | Argentina            | 2                                     | 43                                        | 41                              |
| AT           | Austria              | 12                                    | 24                                        | 12                              |
| AU           | Australia            | 45                                    | 59                                        | 14                              |
| BE           | Belgium              | 10                                    | 33                                        | 23                              |
| BG           | Bulgaria             | 2                                     | 20                                        | 18                              |
| BR           | Brazil               | 2                                     | 17                                        | 15                              |
| CA           | Canada               | 46                                    | 49                                        | 4                               |
| CH           | Switzerland          | 86                                    | 37                                        | -49                             |
| CL           | Chile                | 1                                     | 73                                        | 72                              |
| CN           | China                | 14                                    | 53                                        | 39                              |
| CO           | Colombia             | 5                                     | 100                                       | 95                              |
| CR           | Costa Rica           | 0                                     | 34                                        | 34                              |
| CZ           | Czech Republic       | 7                                     | 65                                        | 58                              |
| DE           | Germany              | 17                                    | 44                                        | 27                              |
| DK           | Denmark              | 24                                    | 46                                        | 22                              |
| EE           | Estonia              | 28                                    | 58                                        | 29                              |
| EG           | Egypt                | 0                                     | 67                                        | 67                              |
| ES           | Spain                | 6                                     | 23                                        | 17                              |
| FI           | Finland              | 23                                    | 33                                        | 10                              |
| FR           | France               | 20                                    | 50                                        | 30                              |
| GB           | United Kingdom       | 42                                    | 49                                        | 7                               |
| GH           | Ghana                | 0                                     | 25                                        | 25                              |
| GR           | Greece               | 4                                     | 17                                        | 13                              |
| GT           | Guatemala            | 0                                     | 18                                        | 18                              |
| HR           | Croatia              | 0                                     | 65                                        | 65                              |
| HU           | Hungary              | 4                                     | 65                                        | 62                              |
| ID           | Indonesia            | 2                                     | 4                                         | 2                               |
| IE           | Ireland              | 36                                    | 68                                        | 32                              |
| IL           | Israel               | 100                                   | 47                                        | -53                             |
| IN           | India                | 2                                     | 12                                        | 9                               |
| IT           | Italy                | 9                                     | 25                                        | 16                              |
| JP           | Japan                | 11                                    | 66                                        | 56                              |
| KR           | South Korea          | 16                                    | 41                                        | 24                              |
| KZ           | Kazakhstan           | 2                                     | 66                                        | 64                              |
| LT           | Lithuania            | 7                                     | 74                                        | 68                              |
| LV           | Latvia               | 0                                     | 79                                        | 79                              |
| MA           | Morocco              | 1                                     | 31                                        | 30                              |
| MW           | Malawi               | 0                                     | 0                                         | 0                               |
| MX           | Mexico               | 2                                     | 29                                        | 27                              |
| MY           | Malaysia             | 13                                    | 17                                        | 5                               |
| NG           | Nigeria              | 2                                     | 50                                        | 48                              |
| NL           | Netherlands          | 13                                    | 34                                        | 21                              |
| NO           | Norway               | 30                                    | 33                                        | 3                               |
| PE           | Peru                 | 3                                     | 39                                        | 36                              |
| PH           | Philippines          | 3                                     | 13                                        | 10                              |
| PK           | Pakistan             | 0                                     | 29                                        | 29                              |
| PL           | Poland               | 2                                     | 60                                        | 58                              |
| PT           | Portugal             | 0                                     | 37                                        | 37                              |
| RO           | Romania              | 11                                    | 87                                        | 75                              |
| RU           | Russia               | 15                                    | 49                                        | 34                              |
| SE           | Sweden               | 48                                    | 32                                        | -16                             |
| SI           | Slovenia             | 9                                     | 53                                        | 44                              |
| SK           | Slovakia             | 0                                     | 58                                        | 58                              |
| SN           | Senegal              | 0                                     | 49                                        | 49                              |
| SV           | El Salvador          | 0                                     | 34                                        | 34                              |
| TH           | Thailand             | 5                                     | 28                                        | 24                              |
| TN           | Tunisia              | 0                                     | 52                                        | 52                              |
| TR           | Turkey               | 7                                     | 90                                        | 83                              |
| US           | United States        | 83                                    | 69                                        | -14                             |
| UY           | Uruguay              | 0                                     | 53                                        | 53                              |
| ZA           | South Africa         | 4                                     | 59                                        | 55                              |

**Note.** Realized high-impact entrepreneurship and high-growth expectations entrepreneurship have been rescaled from 0 to 100 for comparability, because our (reflective) measure of realized high-impact entrepreneurship does not have a natural underlying scale and because this allows us to obtain the entrepreneurial projection bias measure in a straightforward way, via subtraction.

## A2. Alternative operationalizations of high-growth expectations entrepreneurship

Our measure of high-growth expectations entrepreneurship follows the Global Entrepreneurship Monitor definition (GEM, 2022b): We operationalize it as the share of individuals involved in Total early-stage Entrepreneurial Activity (TEA) who expect to create six or more jobs in the coming five years, over individuals involved in TEA.

We recognize that scholars have used different variants of this measure (see review by Hermans et al., 2015). Specifically, prior research has used different thresholds regarding how many jobs early-stage entrepreneurs expect to create. To probe whether our main findings reported in Figure 1 and Figure 2 are robust to alternative operationalizations, in Appendix Figure 1, we measure high-growth expectations entrepreneurship as the share of early-stage entrepreneurs that expect to create 5 or more jobs (Panel A), 10 or more jobs (Panel B), and 19 or more jobs (Panel C). We clearly see that shifting the threshold for high-growth expectations entrepreneurship does not materially improve the association between high-growth expectations entrepreneurship and realized high-impact entrepreneurship.

Appendix Figure 1. Using different thresholds for high-growth expectations entrepreneurship

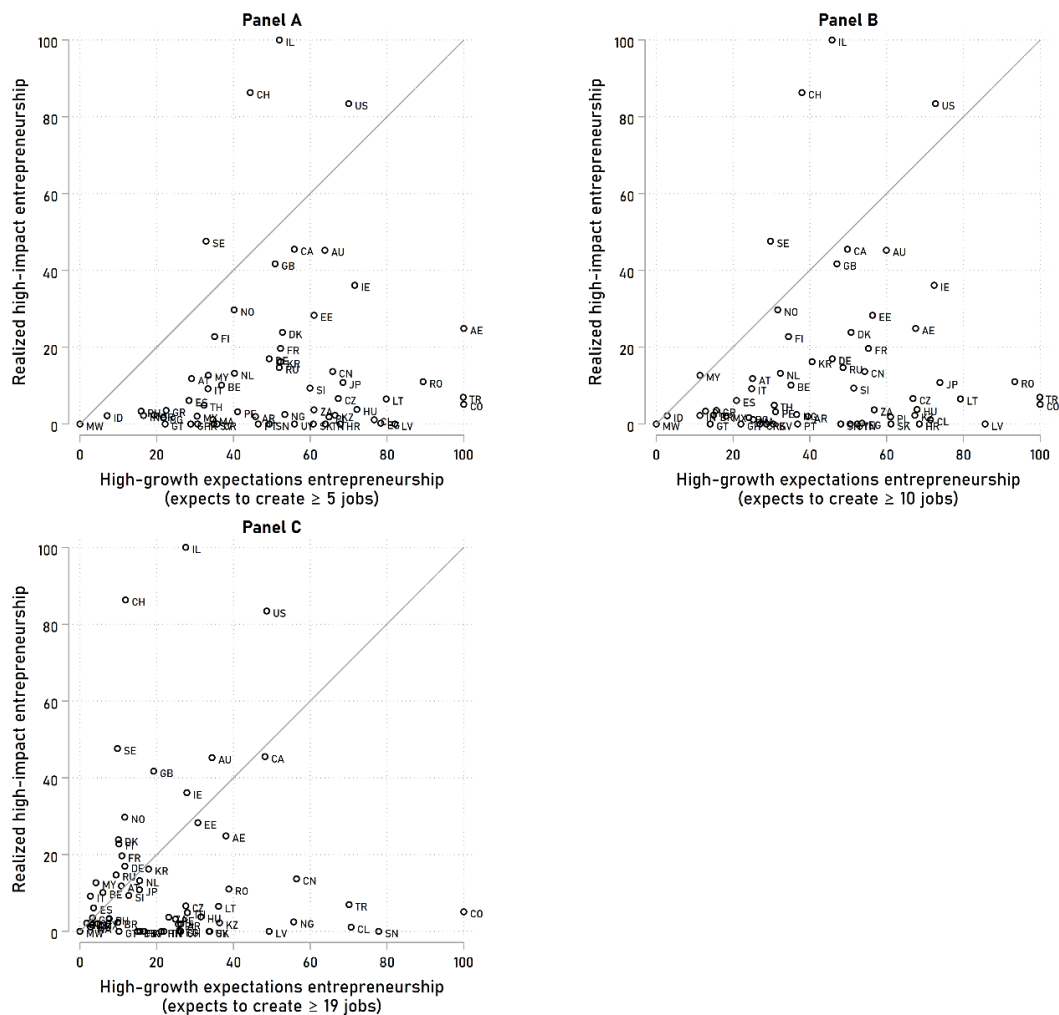

**Note.** Plotted are realized high-impact entrepreneurship—operationalized as a reflective based on the (per million capita) number of venture capital funded initial public offerings, unicorns, global young entrepreneurial firms, and self-made billionaire entrepreneurs—and high-growth expectations entrepreneurship (Autio, 2007; Henrekson and Sanandaji, 2020; Reynolds et al., 2005). We use three different thresholds to define high-growth expectations entrepreneurship: 5 or more jobs (Panel A), 10 or more jobs (Panel B), and 19 or more jobs (Panel C). For comparability, we rescale all measures from 0 to 100 and plot the isoline. Country names are abbreviated as ISO country codes.

In the Global Entrepreneurship Monitor definition (GEM, 2022b), the denominator used in deriving the high-growth expectations entrepreneurship measure is individuals involved in Total early-stage Entrepreneurial Activity (TEA). An alternative approach to the GEM definition is to use countries' populations as the denominator instead (e.g., Decker et al., 2020). In Appendix Figure 2, we operationalize high-growth expectations entrepreneurship as the share of individuals who expect to create six or more jobs in the coming five years in the total population. We clearly see using this alternative denominator does not strengthen the association between high-growth expectations entrepreneurship and realized high-impact entrepreneurship.

*Appendix Figure 2. Using a different denominator when measuring high-growth expectations entrepreneurship*

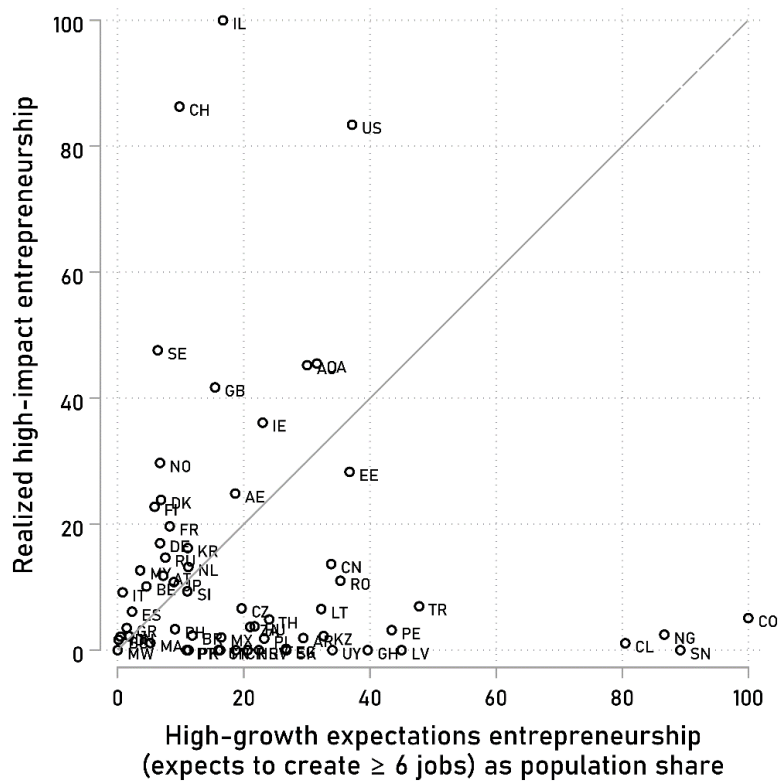

**Note.** Plotted are realized high-impact entrepreneurship –operationalized as a reflective measure based on the (per million capita) number of venture capital funded initial public offerings, unicorns, global young entrepreneurial firms, and self-made billionaire entrepreneurs– and high-growth expectations entrepreneurship –operationalized as the population share of individuals who expect to create six or more jobs in the coming five years–. For comparability, we rescale both measures from 0 to 100 and plot the isoline. Country names are abbreviated as ISO country codes.

For our main comparison of realized high-impact entrepreneurship and high-growth expectations entrepreneurship, we use a consistent time period over which we take mid-run averages, i.e., the period 2010–2017. To probe the robustness of our findings, we also measure high-growth expectations entrepreneurship over the preceding and subsequent periods. Specifically, we measure high-growth expectations entrepreneurship over the period 2001–2009 (see Appendix Figure 3 Panel A) and over the period 2018–2019 (see Appendix Figure 3 Panel B).<sup>1</sup> These alternative measures support our main findings as well.

<sup>1</sup> We end the sampling period for the high-growth expectations entrepreneurship measure used in Panel B to ensure that it is not influenced by the COVID-19 pandemic. We note that we obtain similar results when we end the observation period in 2021 instead.

Appendix Figure 3. Measuring high-growth expectations entrepreneurship prior to or after observing realized high-impact entrepreneurship

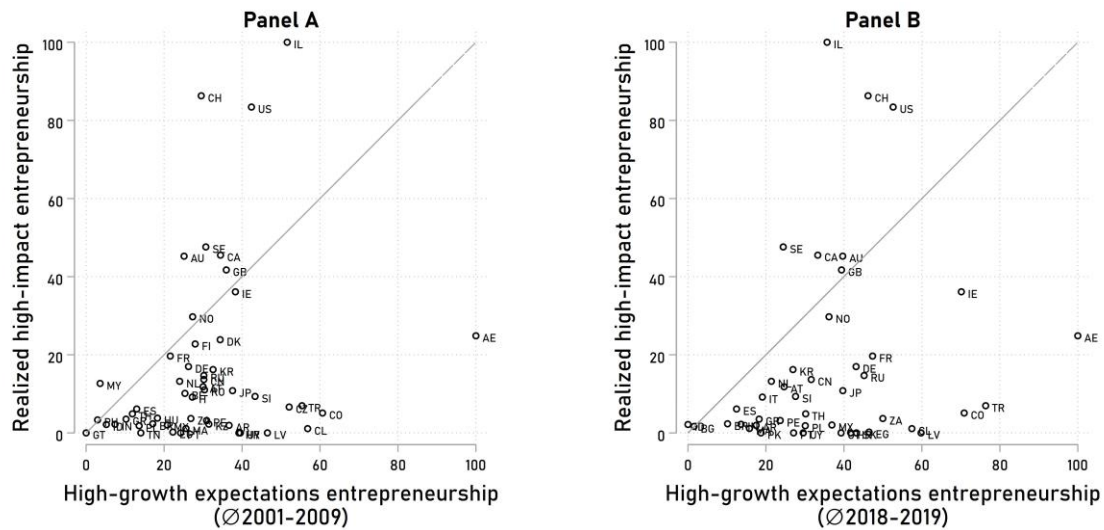

**Note.** Plotted are realized high-impact entrepreneurship –operationalized as a reflective measure based on the (per million capita) number of venture capital funded initial public offerings, unicorns, global young entrepreneurial firms, and self-made billionaire entrepreneurs– and high-growth expectations entrepreneurship –operationalized as the share of individuals involved in Total early-stage Entrepreneurial Activity who expect to create at least 6 or more jobs in the coming 5 years (Autio, 2007; GEM, 2022b; Reynolds et al., 2005)–. To create a lag between high-growth expectations entrepreneurship and realized high-impact entrepreneurship, we measure high-growth expectations entrepreneurship over the period 2001–2009. For comparability, we rescale both measures from 0 to 100 and plot the isoline. Country names are abbreviated as ISO country codes.

### A3. Conditional association realized high-impact entrepreneurship and high-growth expectations entrepreneurship

Figure 1 in the main manuscript documents that high-growth expectations entrepreneurship proxies only imperfectly for realized high-impact entrepreneurship and that the relation between the two may not be a linear one. Given that the critical role of economic development in entrepreneurship has long been highlighted (Wennekers and Thurik, 1999), one may wonder the patterns documented in Figure 1 are driven by these well-established stage-of-economic-development effects. To assess this possibility, Appendix Figure 4 presents the conditional associations between high-growth expectations entrepreneurship and realized high-impact entrepreneurship after conditioning on ln GDP per capita (Panel A) or stage-of-development fixed effects –low income, lower-middle income, upper-middle income, high income following the World Bank classification (World Bank, 2022)– (Panel B). We clearly see that the findings reported in Figure 1 are not merely a result of international differences in economic development.

Appendix Figure 4. Realized high-impact entrepreneurship and high-growth expectations entrepreneurship – partial correlations after conditioning on economic development

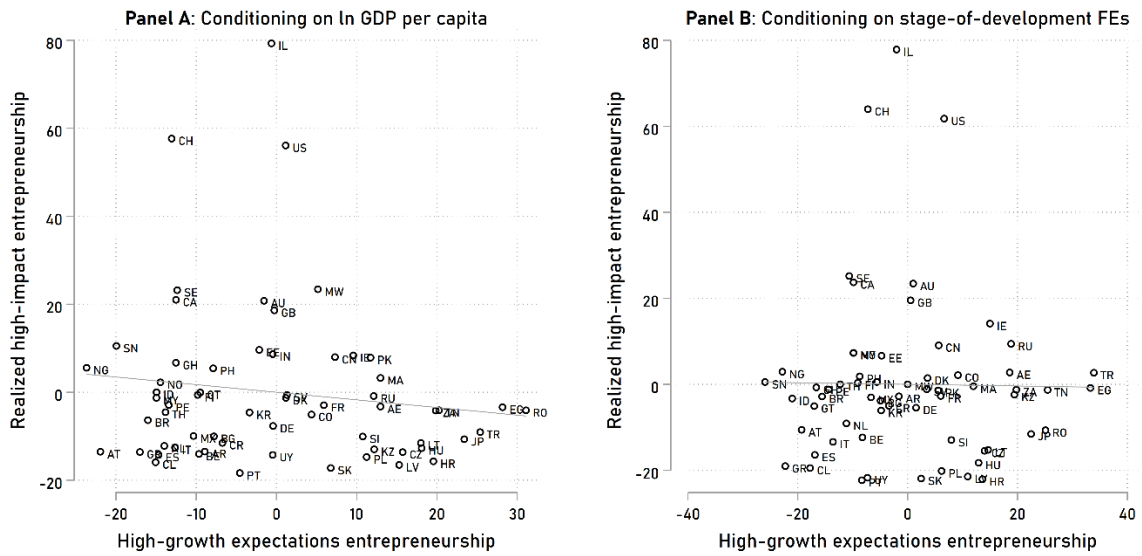

**Note.** Shown are *conditional* associations between realized high-impact entrepreneurship and high-growth expectations entrepreneurship. Panel A conditions on ln GDP per capita and Panel B on stage-of-development fixed effects (low income, lower-middle income, upper-middle income, high income); both are obtained from the World Development Indicators (World Bank, 2022). Country names are abbreviated as ISO country codes.

#### A4. Further details on the control variables used in stylized examples

In this section, we report the descriptive and correlation matrix of the variables used in the stylized examples in Section 2.4 (see Table 3 and Table 4). Appendix Table 4 presents the descriptive statistics and Appendix Table 5 the correlation matrix.

*Appendix Table 4. Descriptive statistics of variables used in stylized examples*

|                                                         | Source                                                                | Coverage  | Number of observations | Mean  | SD     | Min   | Max     |
|---------------------------------------------------------|-----------------------------------------------------------------------|-----------|------------------------|-------|--------|-------|---------|
| Realized high-impact entrepreneurship                   | Henrekson and Sanandaji (2020) Database                               | 2010-2017 | 62                     | 13.87 | 21.41  | 0.00  | 100.00  |
| High-growth expectations entrepreneurship               | GEM Adult Population Survey (GEM, 2022a; Reynolds et al., 2005)       | 2010-2017 | 62                     | 21.11 | 9.52   | 1.22  | 45.20   |
| Individualism                                           | Hofstede (1980; 2010) and Beugelsdijk et al. (2015)                   | 1967-1973 | 59                     | 45.29 | 24.01  | 6.00  | 91.00   |
| Innovation                                              | Global Innovation Index (Dutta et al., 2020)                          | 2018      | 62                     | 31.53 | 12.96  | 10.40 | 62.80   |
| GDP per capita (PPP, in constant 2017 international \$) | World Development Indicators (World Bank, 2022)                       | 2010-2017 | 62                     | 28486 | 17782  | 1411  | 67545   |
| Institutional quality                                   | World Governance Indicators (Kaufmann et al., 2011; World Bank, 2022) | 2010-2017 | 62                     | 0.00  | 0.99   | -1.84 | 1.62    |
| Venture capital availability                            | World Economic Forum Global Competitiveness Index (2017)              | 2010-2017 | 62                     | 2.96  | 0.66   | 1.90  | 4.37    |
| Human capital                                           | Barro and Lee (2013) Database                                         | 2010      | 62                     | 14.85 | 9.51   | 0.02  | 39.76   |
| Service sector employment                               | World Development Indicators (World Bank, 2022)                       | 2010-2017 | 62                     | 62.45 | 14.02  | 16.67 | 81.22   |
| Total population (in millions)                          | World Development Indicators (World Bank, 2022)                       | 2010-2017 | 62                     | 89.85 | 238.01 | 1.32  | 1366.99 |
| Population growth (%)                                   | World Development Indicators (World Bank, 2022)                       | 2010-2017 | 62                     | 0.78  | 0.89   | -1.40 | 2.79    |
| Unemployment rate                                       | World Development Indicators (World Bank, 2022)                       | 2010-2017 | 62                     | 7.84  | 4.58   | 0.60  | 22.74   |
| Inequality                                              | World Development Indicators (World Bank, 2022)                       | 2010-2017 | 62                     | 36.56 | 7.53   | 25.21 | 63.20   |

**Note.** For better a representation of their properties, we present the raw data, rather than the transformed or rescaled values, of the variables which are entered as natural logarithms in the regressions or rescaled for comparison purposes.



*Appendix Table 5. Correlation matrix of variables used in stylized examples*

|    | Number of observations                    | 1  | 2     | 3      | 4      | 5      | 6      | 7      | 8      | 9      | 10     | 11    | 12     | 13   |      |
|----|-------------------------------------------|----|-------|--------|--------|--------|--------|--------|--------|--------|--------|-------|--------|------|------|
| 1  | Realized high-impact entrepreneurship     | 62 | 1.00  |        |        |        |        |        |        |        |        |       |        |      |      |
| 2  | High-growth expectations entrepreneurship | 62 | 0.11  | 1.00   |        |        |        |        |        |        |        |       |        |      |      |
| 3  | Individualism                             | 59 | 0.54* | 0.14   | 1.00   |        |        |        |        |        |        |       |        |      |      |
| 4  | Innovation                                | 62 | 0.66* | 0.06   | 0.69*  | 1.00   |        |        |        |        |        |       |        |      |      |
| 5  | ln GDP per capita                         | 62 | 0.52* | 0.31*  | 0.70*  | 0.74*  | 1.00   |        |        |        |        |       |        |      |      |
| 6  | Institutional quality                     | 62 | 0.56* | 0.14   | 0.75*  | 0.80*  | 0.80*  | 1.00   |        |        |        |       |        |      |      |
| 7  | Venture capital availability              | 62 | 0.63* | -0.06  | 0.38*  | 0.52*  | 0.38*  | 0.48*  | 1.00   |        |        |       |        |      |      |
| 8  | Human capital                             | 62 | 0.58* | 0.22   | 0.46*  | 0.58*  | 0.66*  | 0.58*  | 0.21   | 1.00   |        |       |        |      |      |
| 9  | Service sector employment                 | 62 | 0.51* | 0.21   | 0.66*  | 0.60*  | 0.84*  | 0.74*  | 0.29*  | 0.64*  | 1.00   |       |        |      |      |
| 10 | Total population (in millions)            | 62 | -0.03 | -0.13  | -0.12  | 0.08   | -0.27* | -0.26* | 0.21   | -0.20  | -0.39* | 1.00  |        |      |      |
| 11 | Population growth (%)                     | 62 | 0.08  | -0.25* | -0.28* | -0.38* | -0.52* | -0.36* | 0.12   | -0.38* | -0.37* | 0.08  | 1.00   |      |      |
| 12 | Unemployment rate                         | 62 | -0.16 | 0.15   | 0.17   | -0.01  | 0.11   | 0.07   | -0.29* | 0.09   | 0.23   | -0.12 | -0.36* | 1.00 |      |
| 13 | Inequality                                | 62 | -0.18 | -0.11  | -0.36* | -0.48* | -0.48* | -0.48* | -0.16  | -0.36* | -0.20  | 0.10  | 0.32*  | 0.09 | 1.00 |

**Note.** All variables are averaged over the period 2010–2017 (except for individualism and human capital). Individualism data are available only for a subset of the observations used in the study, for 59 countries (Beugelsdijk et al., 2015; Hofstede et al., 2010). Therefore, row and column 3 are based on 59 observations, while all other rows and columns are based on 62 observations. Human capital data stems from the Barro and Lee (2013) database and refers to the year 2010. \* denotes correlations that are statistically significant at the 5% level or lower.

## A5. Unconditional regression results of stylized examples

For brevity, in Section 2.4 we present the fully specified models of the stylized examples (see Table 3 and Table 4). To further substantiate these stylized examples, we also present the unconditional associations here. Appendix Table 6 and Appendix Table 7 present the unconditional associations between individualism and entrepreneurship, and entrepreneurship and innovation, respectively, without adjusting for the country-level controls described in Section 2.4. The patterns we observe are in line with the main findings shown in Table 3 and Table 4.

Appendix Table 6. Stylized Example 1

|                                 | (1)                                         | (2)                                             | (3)                                             |
|---------------------------------|---------------------------------------------|-------------------------------------------------|-------------------------------------------------|
|                                 | Realized<br>high-impact<br>entrepreneurship | High-growth<br>expectations<br>entrepreneurship | High-growth<br>expectations<br>entrepreneurship |
| <b>Independent variable</b>     |                                             |                                                 |                                                 |
| Individualism                   | 0.540***<br>(0.000)                         | 0.139<br>(0.276)                                | 0.376***<br>(0.000)                             |
| <b>Additional adjustment</b>    |                                             |                                                 |                                                 |
| Entrepreneurial projection bias |                                             |                                                 | 0.778***<br>(0.000)                             |
| Observations                    | 59                                          | 59                                              | 59                                              |
| R-squared                       | 0.292                                       | 0.019                                           | 0.569                                           |

**Note.** The results are based on OLS regressions and presented as beta-coefficients and exact  $p$ -values (in parentheses); \*\*\*  $p < .01$ , \*\*  $p < .05$ , \*  $p < .1$ ; two-tailed tests. The constant was estimated but is not reported for brevity. We tested the equality of the estimated individualism coefficients based on an overarching structural equation model and (partially) rejected the null of no significant differences across outcomes and model specifications [individualism (1) = (2):  $p > \chi^2 = .008$ , individualism (2) = (3):  $p > \chi^2 = .012$ , individualism (1) = (3):  $p > \chi^2 = .041$ ].

Appendix Table 7. Stylized Example 2

|                                           | (1)                 | (2)              | (3)                  |
|-------------------------------------------|---------------------|------------------|----------------------|
|                                           | Innovation          | Innovation       | Innovation           |
| <b>Independent variables</b>              |                     |                  |                      |
| Realized high-impact entrepreneurship     | 0.661***<br>(0.000) |                  |                      |
| High-growth expectations entrepreneurship |                     | 0.058<br>(0.610) | 0.653***<br>(0.000)  |
| <b>Additional adjustment</b>              |                     |                  |                      |
| Entrepreneurial projection bias           |                     |                  | -0.887***<br>(0.000) |
| Observations                              | 62                  | 62               | 62                   |
| R-squared                                 | 0.436               | 0.003            | 0.437                |

**Note.** The results are based on OLS regressions and presented as beta-coefficients and exact  $p$ -values (in parentheses); \*\*\*  $p < .01$ , \*\*  $p < .05$ , \*  $p < .1$ ; two-tailed tests. The constant was estimated but is not reported for brevity. We tested the equality of the estimated realized high-impact and high-growth expectations entrepreneurship coefficients based on an overarching structural equation model and (partially) rejected the null of no significant differences across outcomes and model specifications [independent variables (1) = (2):  $p > \chi^2 < .000$ , independent variables (2) = (3):  $p > \chi^2 < .000$ , independent variables (1) = (3):  $p > \chi^2 = .911$ ].

## A6. Country-level descriptive statistics opportunity-motivated entrepreneurship and entrepreneurial opportunity projection bias

Appendix Table 8. Descriptive statistics opportunity-motivated entrepreneurship

| Country code | Country              | Realized high-impact entrepreneurship | Opportunity-motivated entrepreneurship | Entrepreneurial opportunity projection bias |
|--------------|----------------------|---------------------------------------|----------------------------------------|---------------------------------------------|
| AE           | United Arab Emirates | 25                                    | 10                                     | -15                                         |
| AR           | Argentina            | 2                                     | 30                                     | 28                                          |
| AT           | Austria              | 12                                    | 19                                     | 7                                           |
| AU           | Australia            | 45                                    | 28                                     | -17                                         |
| BE           | Belgium              | 10                                    | 3                                      | -7                                          |
| BG           | Bulgaria             | 2                                     | 0                                      | -2                                          |
| BR           | Brazil               | 2                                     | 35                                     | 33                                          |
| CA           | Canada               | 46                                    | 37                                     | -8                                          |
| CH           | Switzerland          | 86                                    | 12                                     | -74                                         |
| CL           | Chile                | 1                                     | 59                                     | 58                                          |
| CN           | China                | 14                                    | 25                                     | 11                                          |
| CO           | Colombia             | 5                                     | 54                                     | 49                                          |
| CR           | Costa Rica           | 0                                     | 28                                     | 28                                          |
| CZ           | Czech Republic       | 7                                     | 11                                     | 4                                           |
| DE           | Germany              | 17                                    | 4                                      | -13                                         |
| DK           | Denmark              | 24                                    | 6                                      | -18                                         |
| EE           | Estonia              | 28                                    | 34                                     | 6                                           |
| EG           | Egypt                | 0                                     | 10                                     | 10                                          |
| ES           | Spain                | 6                                     | 4                                      | -2                                          |
| FI           | Finland              | 23                                    | 8                                      | -15                                         |
| FR           | France               | 20                                    | 5                                      | -14                                         |
| GB           | United Kingdom       | 42                                    | 15                                     | -27                                         |
| GH           | Ghana                | 0                                     | 74                                     | 74                                          |
| GR           | Greece               | 4                                     | 7                                      | 3                                           |
| GT           | Guatemala            | 0                                     | 34                                     | 34                                          |
| HR           | Croatia              | 0                                     | 8                                      | 8                                           |
| HU           | Hungary              | 4                                     | 12                                     | 8                                           |
| ID           | Indonesia            | 2                                     | 38                                     | 36                                          |
| IE           | Ireland              | 36                                    | 13                                     | -23                                         |
| IL           | Israel               | 100                                   | 18                                     | -82                                         |
| IN           | India                | 2                                     | 12                                     | 9                                           |
| IT           | Italy                | 9                                     | 1                                      | -8                                          |
| JP           | Japan                | 11                                    | 1                                      | -10                                         |
| KR           | South Korea          | 16                                    | 11                                     | -5                                          |
| KZ           | Kazakhstan           | 2                                     | 21                                     | 19                                          |
| LT           | Lithuania            | 7                                     | 20                                     | 14                                          |
| LV           | Latvia               | 0                                     | 28                                     | 28                                          |
| MA           | Morocco              | 1                                     | 7                                      | 6                                           |
| MW           | Malawi               | 0                                     | 62                                     | 62                                          |
| MX           | Mexico               | 2                                     | 30                                     | 28                                          |
| MY           | Malaysia             | 13                                    | 14                                     | 2                                           |
| NG           | Nigeria              | 2                                     | 90                                     | 88                                          |
| NL           | Netherlands          | 13                                    | 19                                     | 6                                           |
| NO           | Norway               | 30                                    | 11                                     | -18                                         |
| PE           | Peru                 | 3                                     | 65                                     | 61                                          |
| PH           | Philippines          | 3                                     | 37                                     | 34                                          |
| PK           | Pakistan             | 0                                     | 8                                      | 8                                           |
| PL           | Poland               | 2                                     | 13                                     | 11                                          |
| PT           | Portugal             | 0                                     | 13                                     | 13                                          |
| RO           | Romania              | 11                                    | 14                                     | 3                                           |
| RU           | Russia               | 15                                    | 1                                      | -13                                         |
| SE           | Sweden               | 48                                    | 11                                     | -36                                         |
| SI           | Slovenia             | 9                                     | 7                                      | -2                                          |
| SK           | Slovakia             | 0                                     | 17                                     | 17                                          |
| SN           | Senegal              | 0                                     | 100                                    | 100                                         |
| SV           | El Salvador          | 0                                     | 32                                     | 32                                          |
| TH           | Thailand             | 5                                     | 50                                     | 45                                          |
| TN           | Tunisia              | 0                                     | 9                                      | 9                                           |
| TR           | Turkey               | 7                                     | 20                                     | 13                                          |
| US           | United States        | 83                                    | 28                                     | -56                                         |
| UY           | Uruguay              | 0                                     | 31                                     | 31                                          |
| ZA           | South Africa         | 4                                     | 13                                     | 9                                           |

**Note.** Realized high-impact entrepreneurship and opportunity-motivated entrepreneurship have been rescaled from 0 to 100 for comparability, because our (reflective) measure of realized high-impact entrepreneurship does not have a natural underlying scale, and because this allows us to obtain entrepreneurial opportunity projection bias measure in a straightforward way, via subtraction. Realized high-impact entrepreneurship is operationalized as a reflective measure based on the (per million capita) number of venture capital funded initial public offerings, unicorns, global young entrepreneurial firms, and self-made billionaire entrepreneurs using the Henrekson and Sanandaji (2020) database. Opportunity-motivated entrepreneurship is taken from GEM data (GEM, 2022b, 2022a; Reynolds et al., 2005). The entrepreneurial opportunity projection bias measure would be of value in those instances where opportunity-motivated entrepreneurship is used as a proxy for high-impact entrepreneurship.

## A7. Conditional association between realized high-impact entrepreneurship and opportunity-motivated entrepreneurship

Figure 4 in the manuscript documents the imperfect association between opportunity-motivated entrepreneurship and realized high-impact entrepreneurship. We again (cf. Figure 1 and Appendix Figure 4) probe whether this imperfect relation is driven by the international differences in economic development (Wennekers and Thurik, 1999). Appendix Figure 5 plots the conditional associations between opportunity-motivated entrepreneurship and realized high-impact entrepreneurship after conditioning on ln GDP per capita (in Panel A) or stage-of-development fixed effects (low income, lower-middle income, upper-middle income, high income) (in Panel B). We see that the findings reported in Figure 4 are not driven solely by differences in economic development.

Appendix Figure 5. Realized high-impact entrepreneurship and opportunity-motivated entrepreneurship – partial correlations after conditioning on economic development

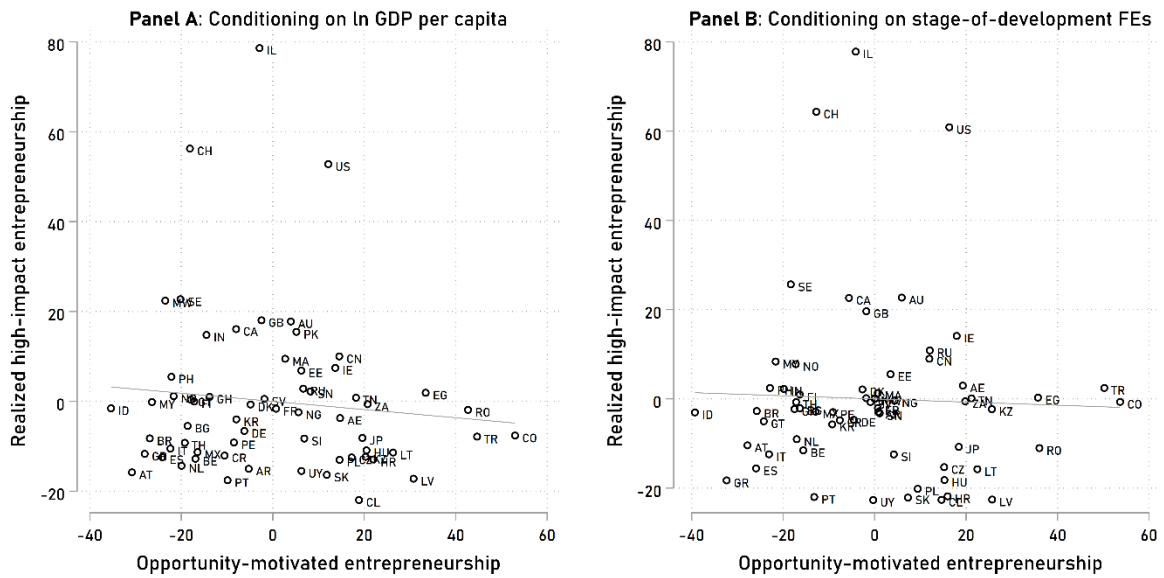

**Note.** Shown are *conditional* associations between realized high-impact entrepreneurship and opportunity-motivated entrepreneurship. Panel A conditions on ln GDP per capita and Panel B on stage-of-development fixed effects (low income, lower-middle income, upper-middle income, high income); both are obtained from the World Development Indicators (World Bank, 2022). Country names are abbreviated as ISO country codes.
